# Supplementary material for: Hypoglycemic, hypolipidemic and antioxidant effects of iridoid glycosides extracted from Corni fructus: possible involvement of the PI3K–Akt/PKB signaling pathway
Source: Royal Society of Chemistry journal article supplement (doi:10.1039/c8ra06045b), 2018-01-01
Supplement: c8ra06045b1.xlsx [file c8ra06045b1.xlsx]

## Sheet: kidney index
	NC	%	DM	%	CIG-L	%	CIG-M	%	CIG-H	%
	0.49	1.46487	0.5	1.84026	0.45	1.6766	0.34	1.1708	0.44	1.46034
	0.31	0.926756	0.57	2.0979	0.4	1.49031	0.37	1.2741	0.48	1.5931
	0.56	1.67414	0.39	1.43541	0.39	1.45306	0.37	1.2741	0.43	1.42715
	0.59	1.76383	0.38	1.3986	0.4	1.49031	0.44	1.51515	0.47	1.55991
	0.3	0.896861	0.44	1.61943	0.49	1.82563	0.42	1.44628	0.43	1.42715
	0.71	2.12257	0.5	1.84026	0.38	1.4158	0.58	1.99725
			0.43	1.58263	0.37	1.37854	0.46	1.58402
			0.33	1.21457	0.4	1.49031	0.42	1.44628
			0.45	1.65624	0.38	1.4158	0.41	1.41185
			0.42	1.54582	0.39	1.45306	0.44	1.51515
					0.4	1.49031	0.45	1.54959
MEAN		1.47484		1.74036		1.47541		1.41873		1.43821
SD		0.485251		0.600344		0.0808685		0.136588		0.019162

## Sheet:  spleen index
	NC		DM		CIG-L		CIG-M		CIG-H
	0.17	0.508221	0.1	0.368053	0.13	0.484352	0.08	0.275482	0.27	0.896117
	0.09	0.269058	0.24	0.883327	0.06	0.223547	0.11	0.378788	0.13	0.431464
	0.13	0.38864	0.11	0.404858	0.08	0.298063	0.08	0.275482	0.06	0.199137
	0.18	0.538117	0.12	0.441664	0.1	0.372578	0.07	0.241047	0.07	0.232327
	0.07	0.209268	0.1	0.368053	0.1	0.372578	0.04	0.137741	0.1	0.331895
	0.07	0.209268	0.11	0.404858	0.06	0.223547	0.1	0.344353
			0.11	0.404858	0.06	0.223547	0.11	0.378788
			0.08	0.294442	0.08	0.298063	0.18	0.619835
			0.1	0.368053	0.05	0.186289	0.08	0.275482
			0.07	0.257637	0.06	0.223547	0.14	0.482094
					0.06	0.223547	0.09	0.309917
MEAN		0.269058		0.394342		0.260805		0.314837		0.254453
SD		0.0845569		0.0278222		0.0563285		0.0805829		0.0690895

## Sheet: liver index
	NC	%	DM	%	CIG-L	%	CIG-M	%	CIG-H	%
	1.63	4.87294	1.99	7.32425	2.27	8.45753	2.28	7.85124	2.1	5.9698
	1.95	5.8296	2.68	9.86382	1.82	6.78092	2	6.88705	1.96	6.50514
	1.35	4.03587	1.61	5.92565	2.21	8.23398	1.7	5.85399	3.11	10.3219
	1.66	4.96263	2.35	8.64925	2.47	9.20268	1.85	6.37052	2.45	8.13143
	1.1	3.28849	2.23	8.20758	2.35	8.75559	1.6	5.50964	1.98	6.57152
	1.73	5.1719	2.36	8.68605	2.38	8.86736	2.6	8.95317
			2.27	8.3548	2.09	7.78689	1.81	6.23278
			2.33	8.57563	1.92	7.1535	2.09	7.19697
			2.55	9.38535	1.94	7.22802	2.83	9.74518		6.9698
			2.34	8.61244	2.16	8.04769	3.16	10.8815
					1.81	6.74367	2.11	7.26584
MEAN		4.97459		8.79187		7.55402		6.64601		6.34882
SD		0.644521		0.553458		0.665222		0.743745		0.329918

## Sheet: TC
NC	NC-空白	NC浓度	DM	DM-空白	DM浓度	CIG-L	L-空白	L浓度	M	M-空白	M浓度	H	H-空白	H浓度	KONGBAI	BIAOZHUN
0.333	0.28	2.73171	0.446	0.393	3.83415	0.46	0.407	3.97073	0.468	0.415	4.04878	0.348	0.295	2.87805	0.055	0.563
0.27	0.217	2.11707	0.432	0.379	3.69756	0.455	0.402	3.92195	0.378	0.325	3.17073	0.366	0.313	3.05366	0.053	0.599
0.325	0.272	2.65366	0.366	0.313	3.05366	0.359	0.306	2.98537	0.483	0.43	4.19512	0.363	0.31	3.02439	0.053	0.596
0.299	0.246	2.4	0.395	0.342	3.33659	0.365	0.312	3.0439	0.256	0.203	1.98049	0.376	0.323	3.15122	0.053	0.679
0.262	0.209	2.03902	0.421	0.368	3.59024	0.442	0.389	3.79512	0.343	0.29	2.82927	0.389	0.336	3.27805	0.052	0.667
0.316	0.263	2.56585	0.625	0.572	5.58049	0.497	0.444	4.33171	0.469	0.416	4.05854	0.367	0.314	3.06341	0.052	0.719
		2.43659	0.527	0.474	4.62439	0.505	0.452	4.40976	0.32	0.267	2.60488	0.308	0.255	2.4878	空白平均值
		2.25543	0.411	0.358	3.49268	0.401	0.348	3.39512	0.328	0.275	2.68293	0.375	0.322	3.14146	0.053	标准平均值
			0.47	0.417	4.06829	0.342	0.289	2.81951	0.372	0.319	3.1122	0.513	0.46	4.4878		0.586
			0.571	0.518	5.05366	0.39	0.337	3.2878	0.439	0.386	3.76585					标准-空白
						0.422	0.369	3.6	0.407	0.354	3.45366					0.533
						0.464	0.411	4.00976
		2.39992			3.7122			3.47927			3.14878			3.00976
		0.249133			0.479852			0.417545			0.681846			0.24028

## Sheet: TG
NC	NC-空白	NC浓度	DM	DM-空白	DM浓度	L	L-空白	L浓度	M	M-空白	M浓度	H	H-空白	H浓度	Y	Y-空白	Y浓度	KONGBAI	BIAOZHUN
0.141	0.082	1.51591	0.176	0.117	2.16294	0.224	0.165	3.05031	0.157	0.098	1.8117	0.164	0.105	1.23689	0.133	0.074	1.36802	0.059	0.183
0.126	0.067	0.98211	0.156	0.097	1.79321	0.123	0.064	1.18315	0.126	0.067	1.23861	0.134	0.075	1.3865	0.104	0.045	0.831902	0.058	0.176
0.12	0.061	1.12769	0.133	0.074	1.36802	0.197	0.138	2.55117	0.11	0.051	0.942822	0.12	0.061	1.12769	0.626	0.567	1.32	0.059	0.188
0.179	0.12	1.2184	0.123	0.064	1.18315	0.135	0.076	1.40499	0.114	0.055	1.01677	0.124	0.065	1.20164	0.106	0.047	0.868875	0.06	0.178
0.127	0.068	1.2571	0.183	0.124	2.29235	0.13	0.071	1.31256	0.115	0.056	1.03526	0.164	0.105	1.9411	0.548	0.489	0.904	空白平均值
0.148	0.089	1.15538	0.336	0.277	5.12082	0.143	0.084	1.55288	0.252	0.193	3.56793	0.18	0.121	2.23689	0.112	0.053	0.979796	0.059
		1.12695	0.181	0.122	2.25538	0.15	0.091	1.68229	0.127	0.068	1.2571	0.117	0.058	1.07223	0.157	0.098	1.8117		标准平均值
		1.18117	0.201	0.142	1.62513	0.142	0.083	1.5344	0.114	0.055	1.01677	0.133	0.074	1.36802	0.166	0.107	1.97808		0.18125
			0.156	0.097	1.79321	0.131	0.072	1.33104	0.116	0.057	1.05374	0.426	0.367	1.18462					标准-空白
			0.176	0.117	2.16294	0.148	0.089	1.28315	0.134	0.075	1.3865		0.051	0.941104					0.12225
						0.14	0.081	1.49742	0.135	0.076	1.40499
		1.19559			1.93165
								1.44984			1.11845			1.18984			1.2578
		0.152891			0.33634			0.139807			0.154986			0.147536			0.443482

## Sheet: HDL
	NC	NC-空白	NC浓度	DM	DM-空白	DM浓度	L	L-空白	L浓度	M	M-空白	M浓度	H	H-空白	H浓度	BIAOZHUN	KONGBAI
k6	0.271	0.224	1.18906	0.437	0.39	2.07023	0.418	0.371	1.96938	0.392	0.345	1.83136	0.309	0.262	1.39077	0.577	0.047
k1	0.261	0.214	1.13597	0.316	0.269	1.42793	0.372	0.325	1.72519	0.285	0.238	1.26337	0.284	0.237	1.25806	0.575	0.048
k2	0.227	0.18	0.955492	0.277	0.23	1.22091	0.355	0.308	1.63495	0.275	0.228	1.21029	0.268	0.221	1.17313	0.5	0.047
k3	0.309	0.262	1.39077	0.34	0.293	1.55533	0.347	0.3	1.59249	0.224	0.177	0.939567	0.232	0.185	0.982033	0.503	0.047
k4	0.317	0.27	1.43324	0.318	0.271	1.43855	0.334	0.287	1.52348	0.262	0.215	1.14128	0.375	0.328	1.74112	0.529	0.046
k5	0.235	0.188	0.997958	0.946	0.899	4.77215	0.406	0.359	1.90568	0.47	0.423	2.24541	0.266	0.219	1.16252		KONGBAI平均值
k6	0.293	0.246	1.30584	0.453	0.406	2.15517	0.401	0.354	1.87913	0.286	0.239	1.26868	0.292	0.245	1.30053		0.047
k1	0.321	0.274	1.45447	0.358	0.311	1.65088	0.326	0.279	1.48101	0.28	0.233	1.23683	0.333	0.286	1.51817	BIAOZHUN平均值
k2	0.244	0.197	1.04573	0.409	0.362	1.9216	0.296	0.249	1.32176	0.276	0.229	1.2156	0.278	0.231	1.22621	0.5368
k3	0.287	0.24	1.27399	0.414	0.367	1.94814	0.357	0.31	1.64557	0.316	0.269	1.42793				标准-空白
k4	0.298	0.251	1.33238				0.362	0.315	1.67211	0.383	0.336	1.78359				0.4898
k5	0.254	0.207	1.09882
			1.12536			1.77098			1.57457			1.21294			1.25143
			0.125905			0.287936			0.128998			0.13749			0.160476

## Sheet: LDL
	NC	NC-空白	NC浓度	DM	DM-空白	DM浓度	L	L-空白	L浓度	M	M-空白	M浓度	H	H-空白	H浓度	BIAOZHUN	标准-空白	KONGBAI	标准液的浓度
k1	0.701	0.66075	3.43991	1.167	1.12675	5.86594	1.045	1.00475	5.2308	0.729	0.68875	3.58568	0.605	0.56475	2.94013	0.555	0.499417	0.04	2.6mmol/L
k1	0.874	0.83375	4.34056	1.109	1.06875	5.56399	0.974	0.93375	4.86117	0.778	0.73775	3.84078	0.636	0.59575	3.10152	0.553		0.041
k2	0.705	0.66475	3.46074	0.963	0.92275	4.8039	1.06	1.01975	5.30889	0.771	0.73075	3.80434	0.743	0.70275	3.65857	0.469		0.04
k2	0.69	0.64975	3.38264	0.851	0.81075	4.22082	1.051	1.01075	5.26204	0.565	0.52475	2.73189	0.774	0.73375	3.81995	0.511		0.04
k3	0.697	0.65675	3.41909	1.069	1.02875	5.35574	0.963	0.92275	4.8039	0.804	0.76375	3.97614	0.645	0.60475	3.14837	0.475		0.099
k3	0.563	0.52275	2.72147	1.06	1.01975	5.30889	1.216	1.17575	6.12104	1.332	1.29175	6.72494	0.81	0.76975	4.00737	平均值
k4	0.884	0.84375	4.39262	1.016	0.97575	5.07982	1.175	1.13475	5.90759	0.886	0.84575	4.40303	0.614	0.57375	2.98698	0.539667		0.04025
k4	0.543	0.50275	2.61735	0.926	0.88575	4.61128	0.862	0.82175	4.27809	0.606	0.56575	2.94533	0.654	0.61375	3.19523
k5	0.79	0.74975	3.90325	1.155	1.11475	5.80347	0.79	0.74975	3.90325	0.717	0.67675	3.52321	0.705	0.66475	3.46074
k5	0.93	0.88975	4.6321	1.155	1.11475	5.80347	0.716	0.67575	3.518	0.829	0.78875	4.10629	1.286	1.24575	6.48546
k6	0.502	0.46175	2.4039				0.961	0.92075	4.79349	0.864	0.82375	4.2885
k6	0.501	0.46075	2.3987
			2.98048			5.44815			5.22039			3.75878			3.28893
			0.487807			0.381561			0.596693			0.414825			0.321743

## Sheet: Body weight
2017-7-25小鼠体重（第0周）			mg								平均值	SD
1	23.43	21.33	19.92	19.34	22.61	22.35					21.4967		20.2948
2	20.97	21.92	20.93	21.9	21.22	19.87					21.135		20.3813
3	19.26	20.89	20.54	20.64	23.16	20.24					20.7883
4	19.43	18.87	20.44	19.55	18.8	22.41					19.9167
5	19.37	22.82	22.78	19.2	18.27	19.31					20.2917
6	22.18	20.91	23.62	21.52	22.03	22.47					22.1217
7	20.94	22.03	21.31	21.86	23.24	21.36					21.79
8	20.33	19.5	21.4	19.95	20.12	21.39					20.4483
9	19.78	20.18	22.97	22.86	20.44	23.83					21.6767
10	21.53	19.45	20.46	20.78	22.11	19.33					20.61
11	19.17	19.79	21.68	20.89	19.42	22.6					20.5917
12	20.04	19.22	18.91	19.76	22.8	19.99					20.12
替补13	14.97	15.59	14.9	16.37	13.56	16.35	16.4	16.44			15.5725
空白14	16.59	18.04	17.55	17.37	17.46	17.22	17.16	17.77	18.02	18.5	17.568
2017-8-1小鼠体重（第1周）			mg
1	24.05	25.22	19.29	21.72	23.16	22.15					22.5983		21.9367
2	21.5	19.35	19.69	19.38	23.02	18.98					20.32
3	19.53	20.51	23.67	21.01	25.5	25.42					22.6067		22.047
4	21.41	23.73	19.78	23.02	22.13	20.6					21.7783
5	23.24	18.55	22.93	23.43	23.66	21.62					22.2383
6	20.65	18.69	16.62	21.75	21.55	19.8					19.8433
7	28.11	21.69	23.32	27.01	25.71	26.32					25.36
8	17.59	18.4	20.28	19.99	25.9	24.03					21.0317
9	21.75	26.68	23.69	21.11	24.32	25.46					23.835
10	23.65	24.58	21.11	27.2	22.2	23.03					23.6283
11	17.28	27.92	21.36	18.46	25.88	20.51					21.9017
12	20.89	26.01	23.94	21.66	25.29	21.76					23.2583
替补13	18	20.69	20.96	24.86	22.57	20.7					21.2967
挑作实验备用组	19.77	20.74	15.3	13.86							17.4175
空白14	22.5	23.06	23.06	21.01	21.27	21.95	23.64	22.37			22.3575
2017-8-8小鼠体重（第2周）
1	25.28	24.03	28.36	26.72	24.14	21.47					25		24.9773
2	24.52	25.56	25.65	22.19	23.46	24.2					24.2633
3	24.74	22.53	27.34	27.15	25.86	23.38					25.1667		25.047
4	24.04	21.91	23.48	22.98	25.24	22.56					23.3683
5	25.42	26.56	24.9	25.65	23.8	20.84					24.5283
6	24.74	23.96	23.6	23.63	23.21	24.11					23.875
7	25.76	23.98	28.27	26.09	28.48	29.42					27
8	28.83	19.53	24.26	24.36	20.92	28.98					24.48
9	28.47	27.16	24.46	28.88	30.18	23.09					27.04
10	28.02	29.74	27.8	26.29	22.12	25.32					26.5483
11	29.75	21.23	24.97	26.49	24.4	29.25					26.015
12	28.41	23.06	28.01	25.91	28.8	23.63					26.3033
替补13	24.93	27.78	19.72	24.15	22.17	25.09					23.9733
挑作实验备用组	24.8	18.18	23.6	21.9							22.12
空白14	25.89	26.97	22.33	27.09	25.6	22.72	24.13	23.25			24.7475
2017-8-15小鼠体重（第3周）
1	30.46	33.13	35.52	31.08	29.95	28.36					30.3817
2	28.88	30.08	34.11	29.52	28.11	30.32
3	33.55	30.2	33.15	29.56	30.4	25.65
4	28.07	33.57	31.56	29.38	28.13	25.48
5	28.81	34.86	30.28	30.56	30.37	30.26
6	30.28	33.28	31.43	31.51	29.5	28.86
7	29.31	32.82	29.03	32.14	30.79	32.04
8	20.3	28.52	24.02	30.13	35.16	34.23
9	30.3	32.9	31.02	34.97	33.93	32.98
10	32.91	35.78	30.44	32.41	32.86	25.96
11	33.3	28.66	28.56	27.59	33.35	30.88
12	29.98	29.3	33.97	33.76	27.15	32.01
替补13	29.27	32.11	29.75	23.05	26.69	25.3
挑作实验备用组	30.2	23.52	29.34	30.39
空白14	32.18	33.48	23.75	29.99	26.9	32.71	29.19	29.94			29.7675
2017-8-15小鼠体重（第4周）
1	30.3	31.77	35.59	32.08	28.57	32.67					31.83		31.2671
2	30.21	29.03	29.58	30.14	28.52	34.99					30.4117
3	26.51	28.91	29.56	30.23	29.99	25.44					29.6725
4	24.95	32.26	31.22	28.98	34.84	28.94					31.248
5	30.23	30.3	28.27	29.87	33.33	29.66					30.2767
6	31.96	30.9	28.66	26.38	29.61	31.98					30.622
7	31.78	27.42	32.98	31.03	30.66	33.03					31.15
8	34.36	20.69	31.21	28.89	23.96	35.13					32.3975
9	34.48	32.43	31.14	29.55	32.67	34.43					32.45
10	33.87	32.32	33.78	27.59	36.94	30.83					32.555
11	27.78	29.31	33.33	33.38	27.42	31.13					30.986
12	32.48	29.17	26.36	26.2	32.36	32.65					31.665
替补13	27.99	24.9	21.64	30.93	24.25	30.65					31.665
挑作实验备用组	31.27	30.17	30.99	21.64							30.81
空白14	32.55	35.88	35.66	26.62	31.76	33.17	30.23	25.03			33.2083
2017-8-27小鼠体重（第5周,灌胃起始体重）														平均值	SD
空白组	29.23	37.6	32.89	33.02	29.87	26.09	34.47	38.53			32.7125	1.93259		32.7125	4.22596
模型组	29.78	31.89	30.46	22.88	23.27						27.018	2.2509		28.1963	2.88181
	27.11	21.73	30.2	27.19	25.67
低剂量	27.3	24.14	28.96	30.9	22.31	31.57					28.42	2.69857		28.7687	1.05101
	29.16	28.87	30.94	28.4	28.2	18.45	28.32
中剂量	30.52	32.75	28.36	32.67	28.46	27.18					30.8508	2.30728		29.775	2.07949
	28.36	39.38	33.15	26.44	29.9	33.04
高剂量	34.75	28.86	22.62	28.13	32.44	31.62					29.58	2.40909		30.4087	2.05903
	30.3	28.63	24.74	29.38	33.91	18.84
备用组	32.31	31.46	33.15	27.76							31.17
2017-9-1小鼠体重（第6周）		灌胃一周后
空白组	30.55	30.78	33.6	37.83	34.3	28.49	38.52	33.6			33.4588	2.29102		33.4588
模型组	25.65	24.83	29.25	25.72	20.03						24.849	2.14869		26.0375	2.14869
	29.43	25.11	24.8	20.16	23.51
低剂量	26.65	30.25	31.07	22.87	22.47	30.8					26.905	1.77853		28.7913	1.77853
	23.88	23.31	29.32	16.64	27.25	27.19	27.8
中剂量	28.95	25.83	26.41	25.88	25.86	31.1					28.9418	2.4505		27.9225	2.66797
	32.32	37.83	22.09	26.98	25.88	31.32
高剂量	31.56	25.96	28.28	21.83	33.48	26.9					28.4973	2.70392		28.264	2.66797
	17.26	35.25	28.65	31.78	24.34	25.44
备用组	25.12	36.32	31.25	31.44							31.0325			28.8687	3.1673
阳性和备用合并后的体重											#REF!
2017-9-9小鼠体重（灌胃2周后）
空白组	35.65	32.62	35.25	30.15	34.99	36.45	37.52	34.22			34.6063	2.31433	34.6063	2.31433
模型组	23.06	20.86	29.38	29.5	29.24						25.972	3.11766	27.2013	2.73981
	30.31	21.25	24.86	24.88	26.38
低剂量	31.02	25.17	30.18	24.22	24.3	27.56	31.42				27.433	2.72917	27.9742	2.53128
	26.63	28.82	23.49	25.01	22.76
中剂量	31.99	26.12	29.12	23.84	27.07						29.0813	2.67453	29.0813	2.6153
	33.6	29.19	28.96	22.52	39.57	26.6
高剂量	32.51	25.91	25.87	22.77	26.87						28.9414	3.26349
	24.19	32.91	17.95	26.78	31.74
2017-9-15小鼠体重（灌胃3周后）				8个
空白组	36.32	35.12	36.37	32.82	32.91	34.82	30.78	34.88			35.108	1.41208	34.2525	1.93241
模型组	22.31	24	28.76	30.43							26.3622	2.11725	26.8688	2.25623
	20.4	25.61	26.24	28.99	26.05	24.87
低剂量	27.8	29.13	22.11	28.05	21.93	29.6					27.61	1.61434
	25.17	22.88	25.48	27.07	28.59
中剂量	25.72	21.96	28.54	23.92	32.02						28.6311	3.20463
	35.4	23.92	26.45	29.21	32.5	22.27
高剂量	27.67	24.8	25.91	26.95	34.54						29.2662	4.13281
	36.38	27.99	29.89	16.28
2017-9-23小鼠体重（灌胃4周后）			（10个）
空白组	31.54	33.56	33.78	34.81	27.05	35.99	32.89	36.32	33.74	34.82	32.59	1.90253	33.45	2.6571
模型组	26.13	26.81	28.26	30.76	27.86						26.75	0.871042	27.167	1.74402
	26.91	24.03	27.9	26.14	26.87
低剂量	26.07	27.94	26.67	28.3	24.78	28.16					26.5191	1.39466	26.84	1.88147
	28.53	23.31	28.81	23.01	26.13
中剂量	24.87	32.77	31.76	25.62	25.77	32.67					29.036	2.67264
	27.77	22.86	25.29	35.91	27.93
高剂量	29.25	34.6	27.36	26.22	28.74						29.23	1.2619	30.133	3.14778
	30.15	34.19	28.56	27.77	34.49
2017-9-23小鼠体重（灌胃4周后）			（10个）
空白组	31.54	33.56	28.21	33.81	37.05	35.99							33.36	33.45	33.36
模型组	29.13	26.81	30.26	21.28	27.86	32.57	24.03	29.9	26.14	25.87			27.385	27.167	27.385
低剂量	26.07	27.94	26.67	28.3	24.78	28.16	28.53	23.31	28.81	23.01	26.13		26.5191	26.84	2.07816
中剂量	24.87	32.77	31.76	28.62	25.77	32.67	27.77	25.86	25.29	35.91	27.93		29.02	29.036	3.70079
高剂量	30.25	34.6	28.36	28.22	30.74								30.1983	30.133	2.58294

## Sheet: FBG
0w
	1号	2号	3号	4号	5号	6号
1	11.7	12.8	10.4	8.9	5.8	12.3		11.22			10.9792
2	6.6	5.3	8.4	7.4	4.6	6.1		7.9
3	9.2	6.8	7.4	23.3	15.1	19.6		14.92
4	14.2	14.9	8.9	18.1	6.1	11.4		13.5			SD
5	6.3	8.4	16.3	5.6	7.1	5.5		10.6	NC	5.84545	0.640813
6	5.6	6.6	6.7	6.2	6.6	6.6
7	6.7	13	6.5	6.5	8.3	8.3		9.86667
8	9.1	11.9	13.8	9.9	18.8	16.5		13.3333
9	6.3	8.2	5.5	8.2	10.1	11.1		9.4	CIG-M	8.9	1.34104
10	6.6	9.4	8	9.9	7.7	8.6		8.72	CIG-H	9.97	2.59617
11	9.2	12.3	7	6.7	10.8	15.8		11.02	DM	17.5333	2.95415
12	8.7	11.3	13.4	11.1	7	12.6		10.6833
14	8.2	10.5	7.4	16.4	9.4	9.7		10.2667	CIG-L	9.93636	1.26596
15	5.6	13.2	11	9.7				11.3
1w
DM	26.6	27.4	22.4	25.4	23.7			24.33	2.00945	24.9625	1.67412
	23.9	26.3	23	21.2	23.4
CIG-L	27.3	23.9	24.8	25.6	28.2	30.1		24.4818	2.91795
	20.6	22.8	17.7	9.1	30.4	22.9	31.9
CIG-M	29.4	14.8	27.7	17.9	27.8	21.6		22.6583	3.13206
	29.1	13.4	25.9	26.1	16.9	21.3
CIG-H	18.9	14.5	20.3	26.8	27.4	31.2		21.9833	3.78484
	13.5	20.1	23	17.1	24.6	26.4
NC	6.3	7.7						5.525	1.05266
	4.6	5.1	5.9	4.9	5.5	4.2
2w
DM	21.7	33	28.6	31.2	27.4	25.2		27.35	3.31993
	25.2	23.8	20.6	26.5
CIG-L	24.9	31.6	23.7	26.9	30.7	24.9		24.695	1.55703
	25.6	23.2	22.25	26.11
CIG-M	31.4	22.9	22.2	27.1	16.3			23.15	3.49691
	21.5	28.3	23.3	23.6
CIG-H	5.2	14.8	17.2	15.6	17.8			18.275	3.26179
	24.6	15.8	19.8	7	20.6
NC	4.7	4.3	3.9	6.1	6.1	8.3	7.3	5.875	1.50973
	6.3
3w
DM	30.9	26.8	30.3	26.7				27.4667	1.87193	27.8875	1.85236
	26.3	4.9	28.9	24.1	26.3	26.9
CIG-L	19.2	28	30.1	22.1	31.7	33.3		25.3333	#REF!
	31.7	30.5	21.2	33.3	31
CIG-M	26.5	28.3	33.3	33.3	26.4			24.8667	3.05864
	19.7	32	33.3	33.3	33	16.3
CIG-H	29	10.9	26.8	17	30.8			20.4286	2.40479
	29.3	33.3	21.7	8.3
NC	3.2	4.7	4.6	3.8	6.4	5.5		4.7	1.00995
4w											10.7
DM	29.76	24.3	33.3	25.2	33.3			27.7075	2.24517		16.2
	28.3	27.3	28.9	28.8	29.1						16.2
CIG-L	23.6	33.3	22.8	19.2	30.1	22.3		22.55	2.05357		12.9
	24.2	21.7	20.8	25.8	31.2						20.9
CIG-M	30.2	20.6	29.9	21.6	30.2			22.4375	2.02268		15.2
	22.1	23.2	24.3	26.1	19.9	21.7
CIG-H	10.7	16.2	25.9	16.2	13.5			14.4375	3.5124
	9.9	12.9	2.4	20.9	15.2
NC	7.1	3.3	3.7	5	5.8	4.9		5.4375	1.03086
	5.5	6.4	5.1
OGTT
FBG-0min
NC	7.1	3.3	3.7	5	5.7	4.9	6.3	5.4	5				5.3875	1.01761
DM	32	24.3	33.3	25.2	33.3	28.3	27.3	28.9	28.8	29.1			27.99	2.37
CIG-L	24.6	33.3	22.6	19.2	19.1	26.3	19.2	19.7	26.8	25.8	31.2		23.0125	3.3043
CIG-M	30.2	20.6	22.9	21.6	30.2	22.3	19.2	18.3	26.1	26.9	21.7		22.375	2.98508
CIG-H	10.7	15.2	25.9	16.2	10.9	12.9	2.4	20.9	15.9	13.1			14.475	2.34
30min
NC	13.6	8.6	9.1	7.7	13.2	9.9	11.45	9.83					10.4225	2.1372
DM	33.3	33.3	33.3	32.7	33.3	33.3	33.3	30.9	33.3	33.3			32.925	0.844732
CIG-L	31.9	33.3	33.3	33	31.9	33.3	33.3	33.3	33.3	33.2	30.9		32.6	0.914955
CIG-M	33.3	33.3	29.5	31.7	33.3	33.3	28.9	33.3	29.2	33.3	33.3		31.5625	2.03606
CIG-H	33.3	29.3	29.9	29.9	20.9	29.3	23.6	19.2					26.925	3.13587
60min
NC	7.6	8.8	7.9	7.3	6.6	7.1	8.3	6.7					7.5375	0.768928
DM	31.4	29.9	31.1	29.9	27.9	25.7	33.3	25.5	33.3	30.8			29.025	2.37171
CIG-L	33.3	26.7	31.6	26.8	33.3	31.6	28.6	28.3	33.3	28.7	26.6		28.6125	2.0336
CIG-M	26.3	27.3	30.2	33.3	26.8	28	24.8	27.1	32.6	33.3	33.3		27.8875	1.38
CIG-H	31.4	19.5	18.8	22.3	31.7	23	26.4	23.3					24.55	4.4042
120min
NC	5.9	7.2	7.6	7.7	2.6	7.3	7.3	7.7	6.9				7.2	0.592814
DM	16.4	26.5	22.7	21	17.1	26.1	33.3	30.4	30.6	27.2			25.13	2.25
CIG-L	25.4	30.2	25.6	22.9	24.7	20.3	30.9	24.3	23.8	25.3	23.7		23.825	1.57
CIG-M	16.8	30.3	22.2	24.8	16.8	19.9	20.3	26.5	24.3	24.3	22.3		22.1375	3.94586
CIG-H	18.6	20.4	17.8	20.2	15.5	14.6	19.6	16.7					17.925	1.56
180min
NC	6.7	7	4.3	5.4	5.7	7	5.9	6.1					6.0125	0.914076
DM	27.7	32.8	21.5	27.4	21	24.6	16.7	9.2	20.7	13.9			21.6875	2.89252
CIG-L	32.3	26.2	28.8	17.6	15.9	18.6	12.9	24.7	16.8	17.1	22.8		19.9625	4.80534
CIG-M	19.8	16.1	14.9	14.7	27.8	18.2	15.3	11.8	30.3	19.8	21		17.475	1.19
CIG-H	11.5	19.7	14.6	16.5	15.7	15.1	16.4	16.25					15.7188	2.28785
			OGTT		0	30	60	120	180		1.01761	2.1372	0.768928	0.592814	0.914076
				NC	5.3875	10.4225	7.5375	7.2	6.0125		2.37	0.844732	2.37171	2.25	2.89252
				DM	27.99	32.925	29.025	25.13	21.6875		2.9413	2.70225	1.67	2.53831	1.44
				CIG-L	23.0125	32.6	28.6125	23.825	19.9625		2.98508	2.03606	1.38	3.94586	1.19
				CIG-M	22.375	31.5625	27.8875	22.1375	17.475		2.34	3.13587	4.4042	1.56	2.28785
				CIG-H	14.475	26.925	24.55	17.925	15.7188
				NC	DM	CIG-M	CIG-L	CIG-H
				1.02	2.37	2.99	1.98	2.34
				2.14	0.84	2.04	0.91	3.14
				0.77	2.37	1.38	2.03	2.68272
				0.59	2.25	2.47988	1.57	1.56
				0.91	2.89	1.19	2.31575	2.12

## Sheet: SOD
	K蛋白浓度	K总SOD	MO蛋白浓度	M0总SOD	L蛋白浓度	L总SOD	M蛋白浓度	M总SOD	H蛋白浓度	H总SOD
	0.678375	211.259	0.483093	163.003	0.466055	166.362	0.521101	200.413	0.479161	204.34
	0.699345	204.725	0.382176	188.611	0.907733	143.423	0.622018	145.099	0.472608	225.844
	0.656094	235.105	0.403145	156.313	1.21835	76.0681	0.783224	116.008	0.62595	226.767
	0.513237	249.952	0.452949	167.164	0.726868	125.002	0.704587	118.639	0.557798	186.602
	0.814679	210.889	0.758322	105.439	0.996855	90.5393	0.564351	158.853	0.564351	178.459
	1.02962	171.188	0.469987	152.082	0.548624	139.116	0.648231	160.724	0.559109	178.674
	0.477851	252.538	0.253735	350.929	0.767497	141.811	0.560419	149.159	0.538139	164.339
	0.642988	205.294	0.787156	113.12	1.19083	85.4562	0.599738	169.48	0.417562	281.425
	0.705898	213.006	0.999476	117.272	0.602359	135.757	0.696723	186.933	0.425426	192.217
			0.722936	112.276	0.414941	173.717	0.311402	223.696	0.515858	202.649
					0.606291	140.88	0.679685	130.115	0.538139	151.957
					0.92346	85.9282			0.606291	129.881
	Mean	217.106		141.698		125.338		159.92		193.596
		222.846		135.834		145.759		174.295		212.315
		19.9181		26.0286		16.1512		27.2878		32.7805

[truncated: 3 more sheets: CRP, HOMA, inflammatory cytokines]
